# Supplementary figures and images for: The characteristics and factors of the internalizing and externalizing behaviours of children at high risk for autism spectrum disorder
Source: Research Square preprint supplement (doi:10.21203/rs.3.rs-506073/v1), 2021-05-17

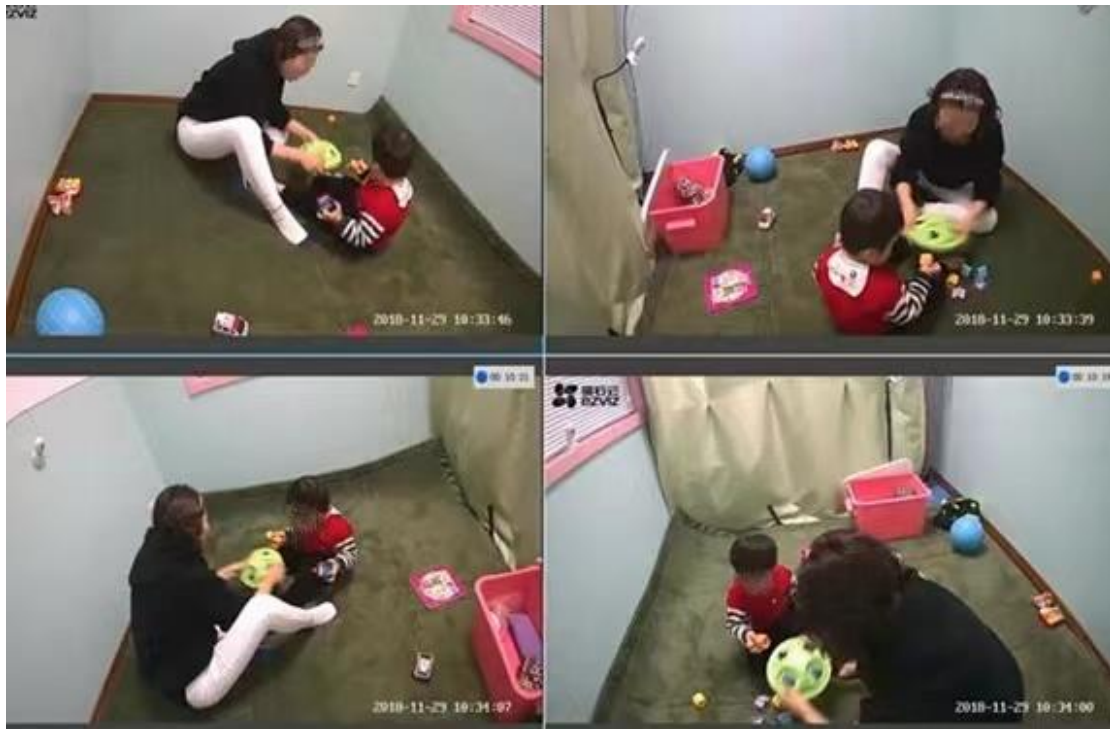

FIGURE 1 | This figure provides an illustration of free play.

Supplement: Supplementary file 1 [file d910b4c9ea401e8300910813.pdf]
